# Supplementary material
Source: PubMed Central journal article supplement (PMC10065198)

**No Inhibitors****M3814****M3814 + TSA****M3814 + TSA + XL413****RNP Only**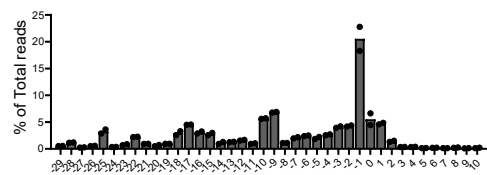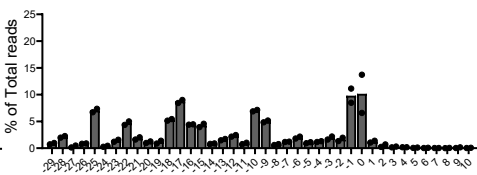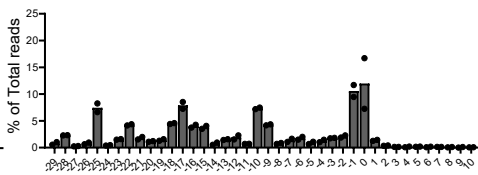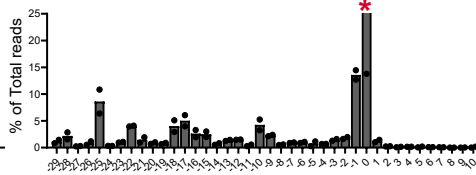**dsDNA**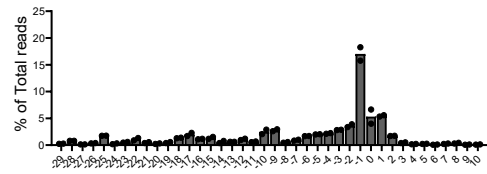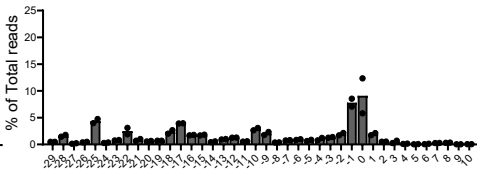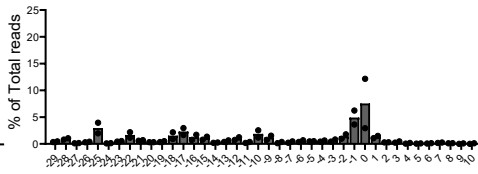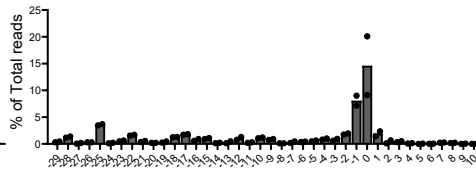**dsCTS**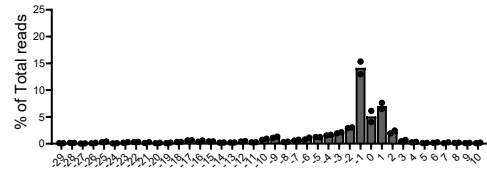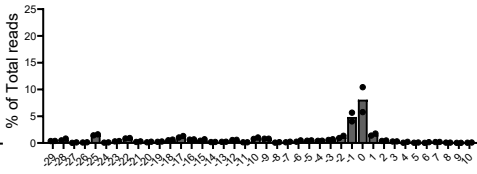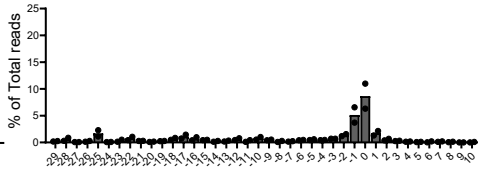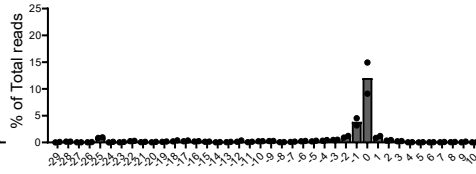**ssDNA**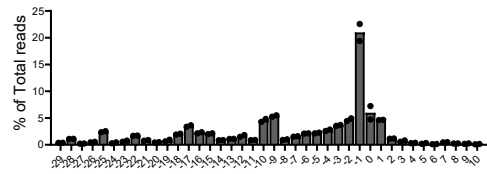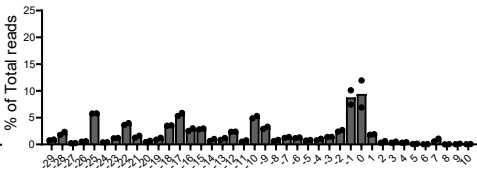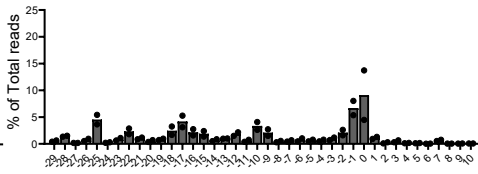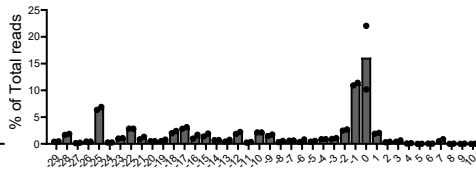**ssCTS**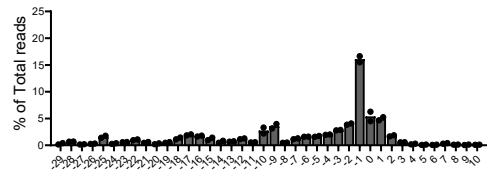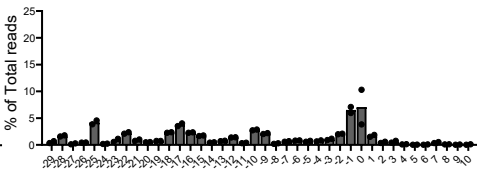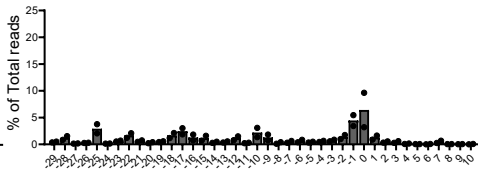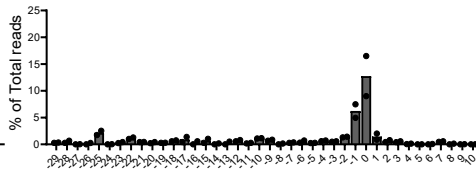

ssDNA

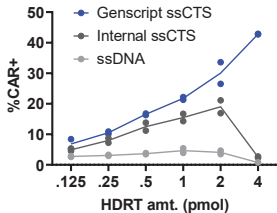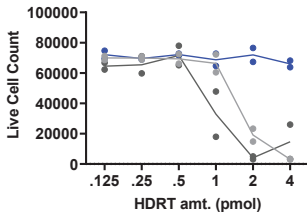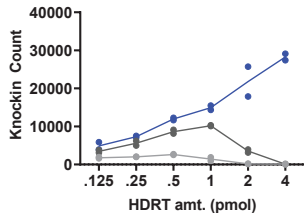

dsDNA

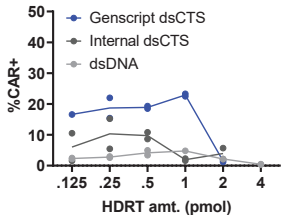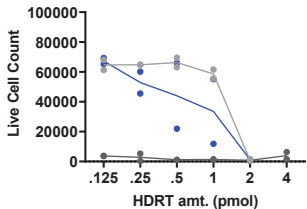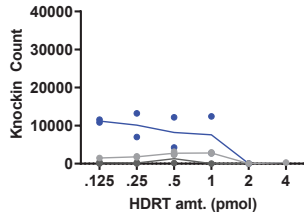

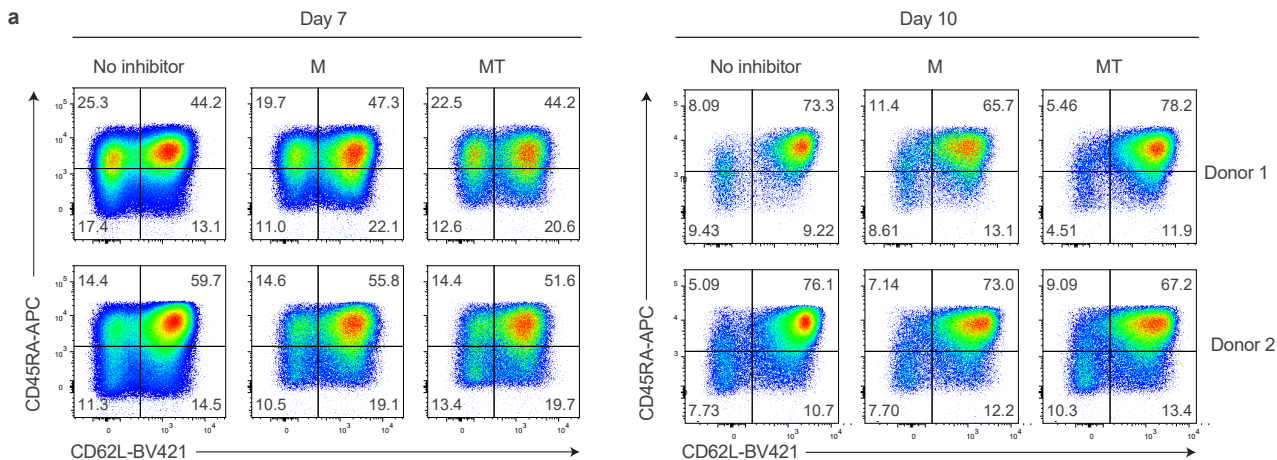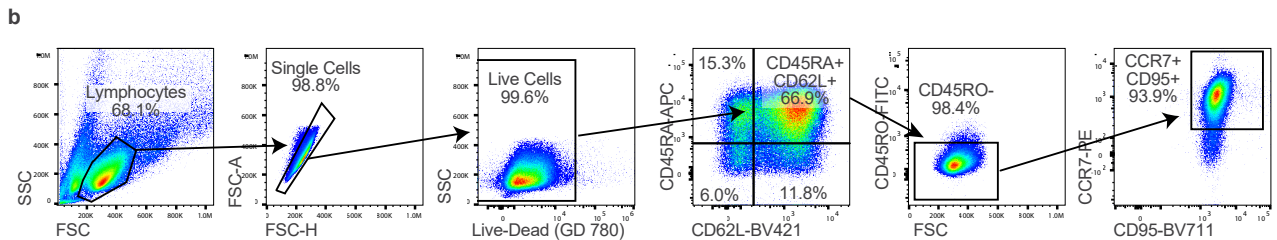

Supplement: NIHMS1875580-supplement-Supplementary_Figures.pdf [file NIHMS1875580-supplement-Supplementary_Figures.pdf]
